# Supplementary material
Source: Springer Nature journal article supplement (https://www.springermedizin.de/resource/supplementary/13058_2011_2966_MOESM4_ESM.pdf/9702914)
Supplement: MOESM4 [file 9702914]

**A**

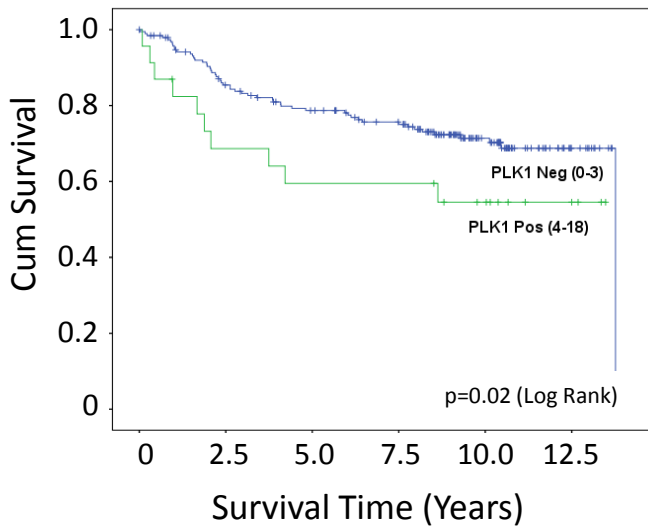

|          | In Follow up after: |         |          |       |
|----------|---------------------|---------|----------|-------|
|          | 1 Year              | 5 Years | 10 Years | Total |
| PLK1 Neg | 181                 | 140     | 63       | 192   |
| PLK1 Pos | 19                  | 14      | 9        | 23    |

**B**

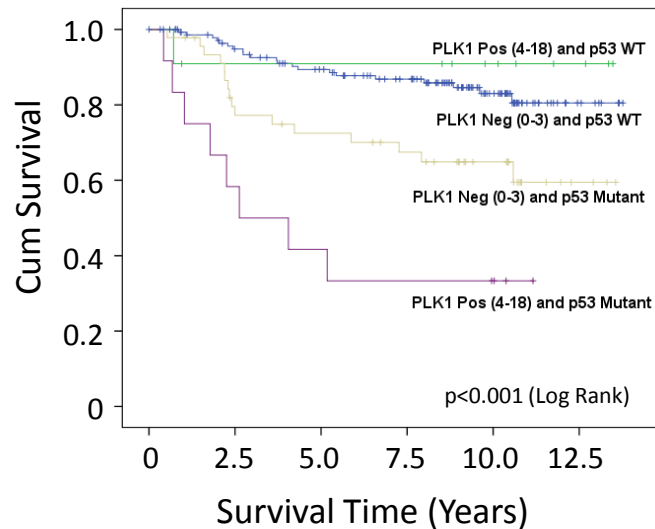

|                      | In Follow up after: |         |          |       |
|----------------------|---------------------|---------|----------|-------|
|                      | 1 Year              | 5 Years | 10 Years | Total |
| PLK1 Neg, p53 WT     | 136                 | 110     | 46       | 146   |
| PLK1 Pos, p53 WT     | 9                   | 9       | 6        | 11    |
| PLK1 Neg, p53 Mutant | 45                  | 30      | 17       | 46    |
| PLK1 Pos, p53 Mutant | 10                  | 5       | 4        | 12    |

**C**

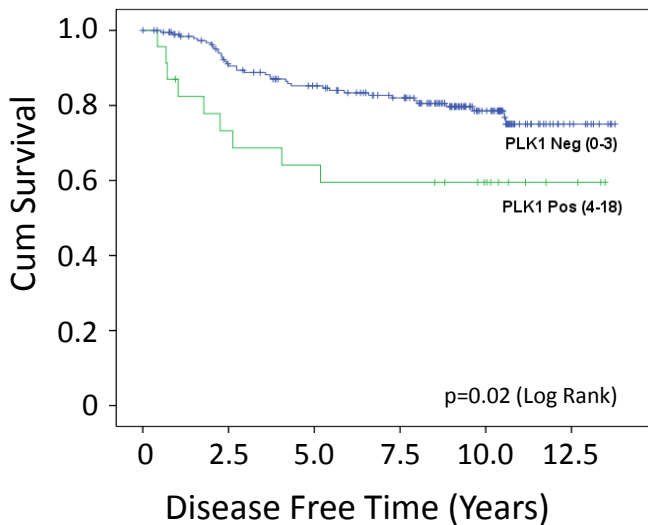

|          | In Follow up after: |         |          |       |
|----------|---------------------|---------|----------|-------|
|          | 1 Year              | 5 Years | 10 Years | Total |
| PLK1 Neg | 178                 | 137     | 62       | 192   |
| PLK1 Pos | 18                  | 13      | 9        | 23    |

**D**

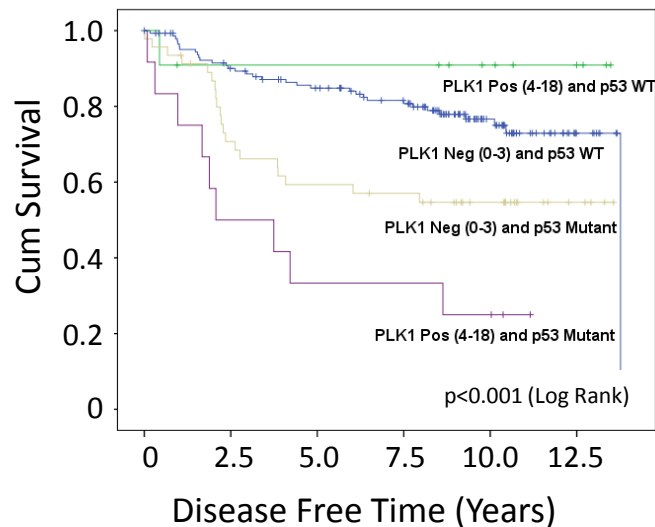

|                      | In Follow up after: |         |          |       |
|----------------------|---------------------|---------|----------|-------|
|                      | 1 Year              | 5 Years | 10 Years | Total |
| PLK1 Neg, p53 WT     | 135                 | 111     | 46       | 146   |
| PLK1 Pos, p53 WT     | 9                   | 9       | 6        | 11    |
| PLK1 Neg, p53 Mutant | 43                  | 26      | 16       | 46    |
| PLK1 Pos, p53 Mutant | 9                   | 4       | 3        | 12    |
